# Supplementary material for: Proteomic profile of extracellular vesicles from plasma and CSF of multiple sclerosis patients reveals disease activity-associated EAAT2
Source: PubMed Central journal article supplement (PMC11370133; doi:10.1186/s12974-024-03148-x), 2024-09-02

A

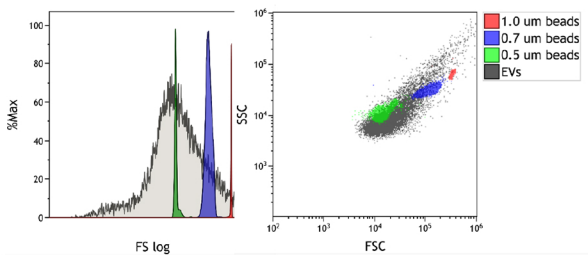

B

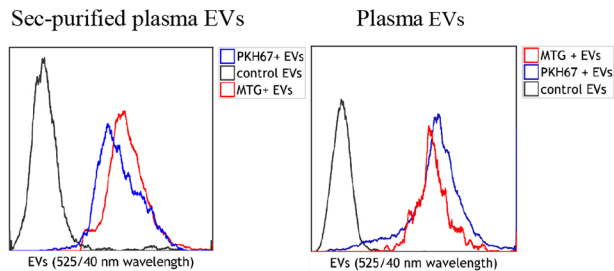

C

### SEC-purified Plasma EVs

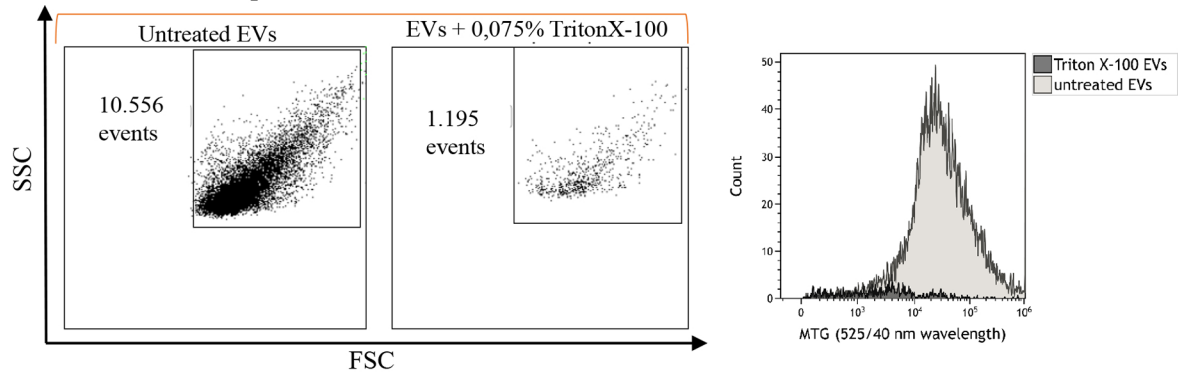

D

### Not purified Plasma EVs

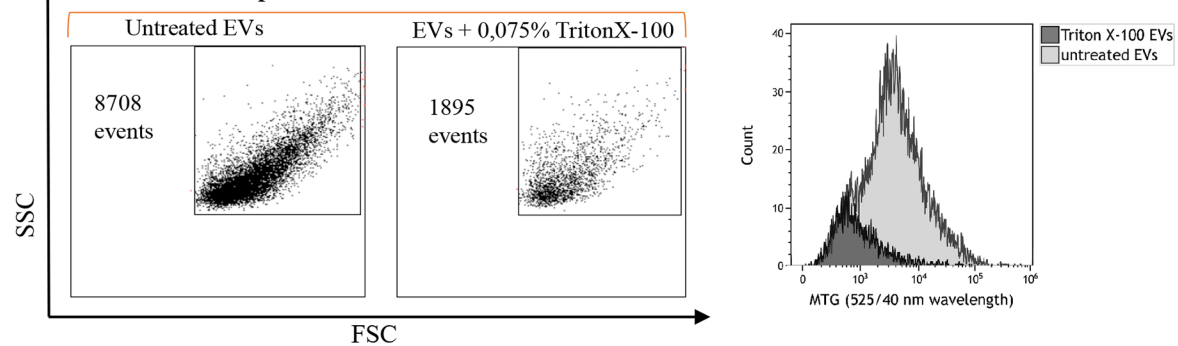

E

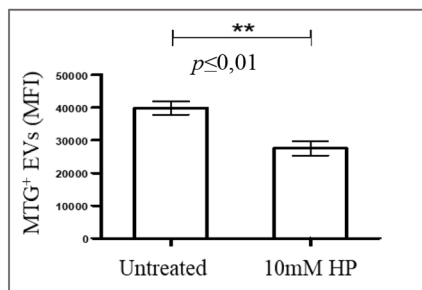

Supplement: 12974_2024_3148_MOESM6_ESM.pdf [file 12974_2024_3148_MOESM6_ESM.pdf]
